# Supplementary material for: Transition metalides based on facially polarized all-cis-1,2,3,4,5,6-hexafluorocyclohexane – a new class of high performance second order nonlinear optical materials
Source: Royal Society of Chemistry journal article supplement (doi:10.1039/d2cp04842f), 2023-01-01
Supplement: d2cp04842f1.pdf [file d2cp04842f1.pdf]

**Transition metalides based on facially polarized *all-cis*-1,2,3,4,5,6-hexafluorocyclohexane – a new class of high performance second order nonlinear optical materials**

*Faiza Ahsan<sup>a</sup>, and Khurshid Ayub<sup>a,\*</sup>*

<sup>a</sup>Department of Chemistry, COMSATS University, Abbottabad Campus, KPK, Pakistan 22060

\*Corresponding author.

Tel: +92-992-383591.

E-mail: [khurshid@cuiatd.edu.pk](mailto:khurshid@cuiatd.edu.pk) (K.A.)

## Table of Content

|                                                                                                                                  |   |
|----------------------------------------------------------------------------------------------------------------------------------|---|
| <b>FIGURE S1</b> OPTIMIZED STRUCTURES OF TRANSITION METALIDES $TM^{-1}-AM^{+}$ ( $TM^{-} = Sc-Zn$ ; $AM^{+} = Li, Na, K$ ) ..... | 5 |
| <b>FIGURE S2</b> HOMO-LUMO DENSITIES OF $TM^{-1}-AM^{+}$ ( $TM^{-} = Ti, Cr, Fe, Ni, AND Zn$ ; $AM^{+} = Na, K$ ).....           | 7 |

| Complex | Side view                                                                           | Top View                                                                            | Complex | Side view                                                                            | Top View                                                                              |
|---------|-------------------------------------------------------------------------------------|-------------------------------------------------------------------------------------|---------|--------------------------------------------------------------------------------------|---------------------------------------------------------------------------------------|
| Li-J-Sc | 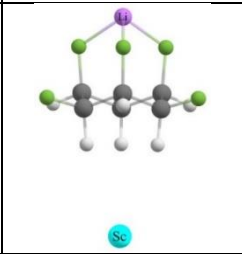   |    | Li-J-Fe |    |    |
| Na-J-Sc |    |    | Na-J-Fe |    |    |
| K-J-Sc  |    |    | K-J-Fe  |    |    |
| Li-J-Ti |  |  | Li-J-Co |  |  |
| Na-J-Ti |  |  | Na-J-Co |  |  |
| K-J-Ti  |  |  | K-J-Co  |  |  |

|         |                                                                                     |                                                                                     |         |                                                                                       |                                                                                       |
|---------|-------------------------------------------------------------------------------------|-------------------------------------------------------------------------------------|---------|---------------------------------------------------------------------------------------|---------------------------------------------------------------------------------------|
| Li-J-V  | 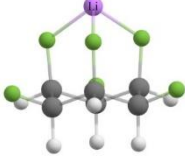   |    | Li-J-Ni |    |    |
| Na-J-V  |    |    | Na-J-Ni |    |    |
| K-J-V   |    |    | K-J-Ni  |    |    |
| Li-J-Cr |   |   | Li-J-Cu |   |   |
| Na-J-Cr |  |  | Na-J-Cu |  |  |
| K-J-Cr  |  |  | K-J-Cu  |  |  |

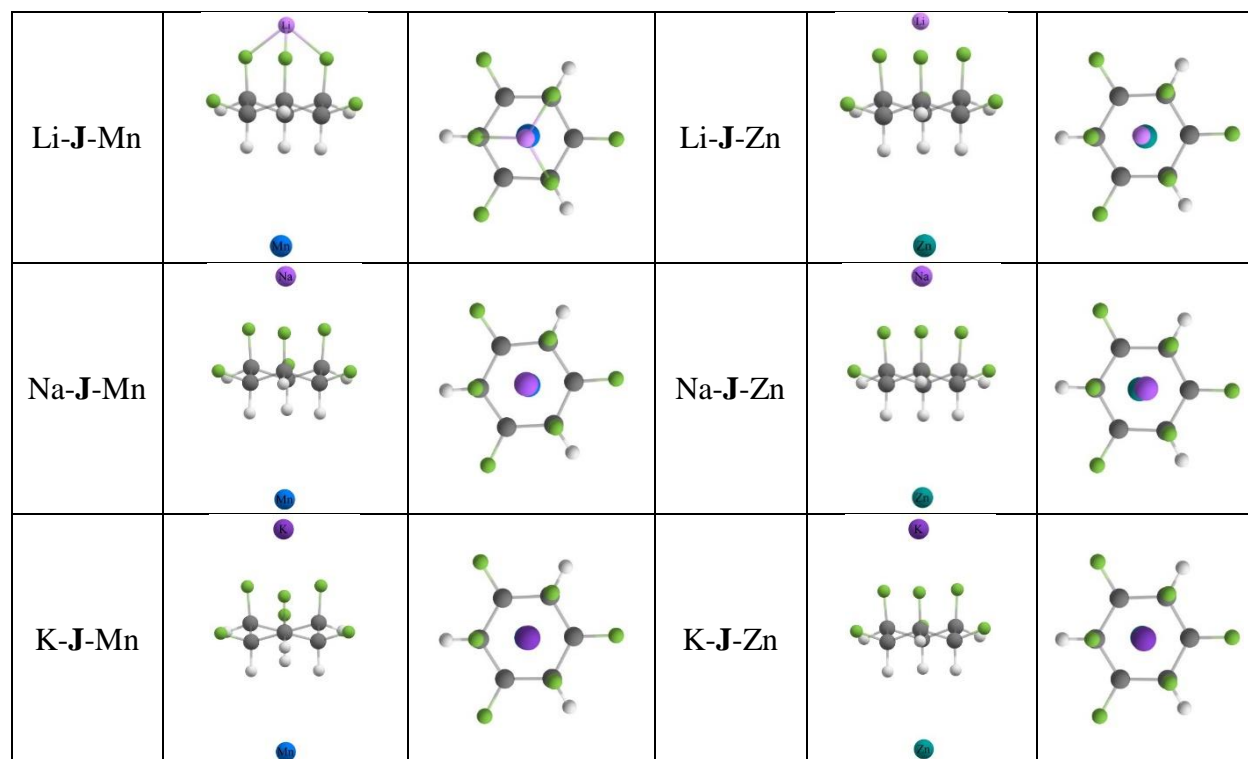

Figure S1 Optimized structures of transition metalides  $\text{TM}^-1\text{-AM}^+$  ( $\text{TM}^- = \text{Sc-Zn}$ ;  $\text{AM}^+ = \text{Li, Na, K}$ )

| HOMO                                                                                | LUMO                                                                                | HOMO                                                                                 | LUMO                                                                                  |
|-------------------------------------------------------------------------------------|-------------------------------------------------------------------------------------|--------------------------------------------------------------------------------------|---------------------------------------------------------------------------------------|
| 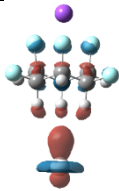   |    |    |    |
| Na-J-Sc                                                                             |                                                                                     | Na-J-Ti                                                                              |                                                                                       |
|    |    |    |    |
| K-J-Sc                                                                              |                                                                                     | K-J-Ti                                                                               |                                                                                       |
|    |    |    |    |
| Na-J-V                                                                              |                                                                                     | Na-J-Cr                                                                              |                                                                                       |
|  |  |  |  |
| K-J-V                                                                               |                                                                                     | K-J-Cr                                                                               |                                                                                       |
|  |  |  |  |
| Na-J-Mn                                                                             |                                                                                     | Na-J-Fe                                                                              |                                                                                       |
|  |  |  |  |
| K-J-Mn                                                                              |                                                                                     | K-J-Fe                                                                               |                                                                                       |

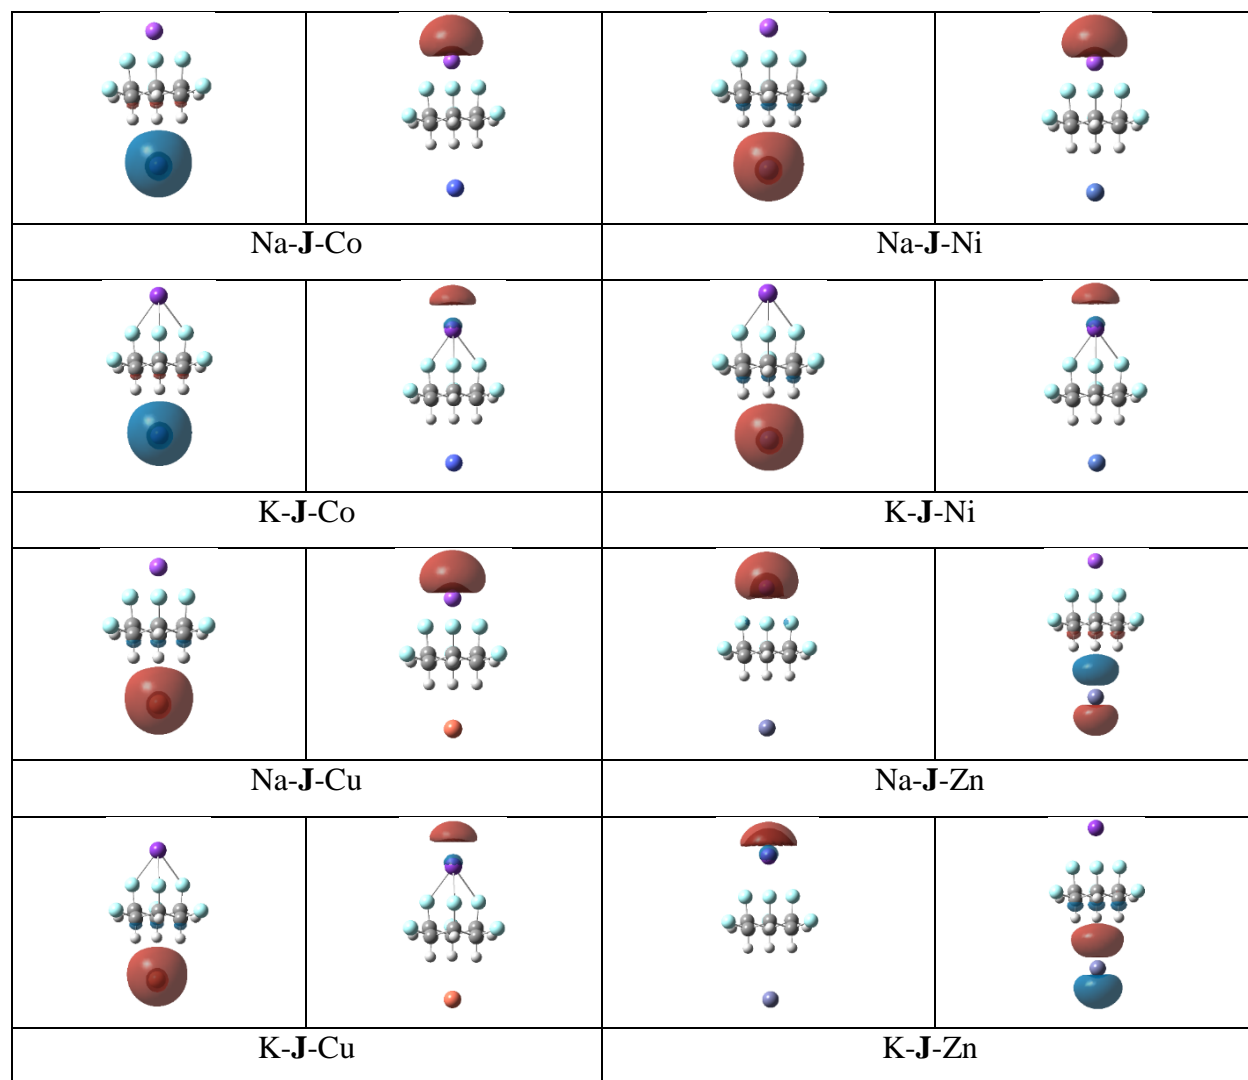

Figure S2 HOMO-LUMO densities of  $\text{TM}^-$ -1- $\text{AM}^+$  ( $\text{TM}^- = \text{Ti, Cr, Fe, Ni, and Zn}$ ;  $\text{AM}^+ = \text{Na, K}$ )
